# Supplementary material
Source: publisher site journal article supplement (https://www.spandidos-publications.com/4723/downloadSupplementary)

Figure S1. Shared KEGG pathways. Shared KEGG pathways, including (A) 'pathways in cancer', (B) 'human T-cell leukemia virus 1 infection', (C) 'HIF-1 signaling pathway' and (D) 'viral carcinogenesis'. HIF, hypoxia-inducible factor. Pentagrams represent the genes that were involved in the DEGs, rectangles refer to gene products, circles generally refer to compounds, +p indicates phosphorylated, -p indicates dephosphorylation, solid arrows represent activation, dotted arrows represent indirect effects, dotted lines represent state changes, the straight line represents the combination, and four rectangles represent the complex. KEGG, Kyoto Encyclopedia of Genes and Genomes.

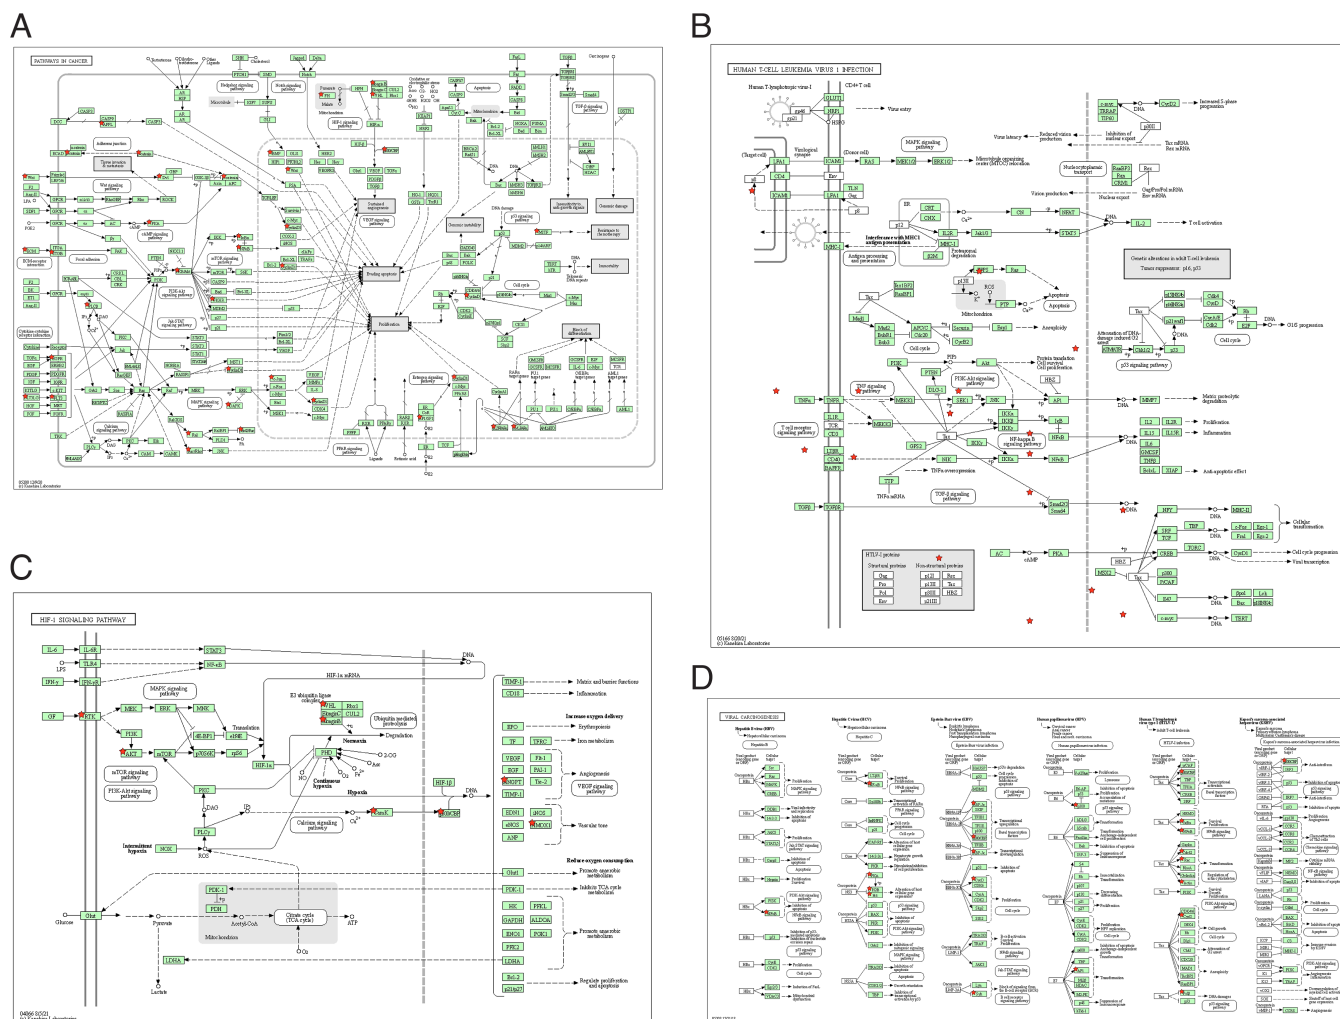

Supplement: Supplementary file 1 [file downloadSupplementary]
